# Supplementary material for: Molecular evidence of functional progesterone withdrawal in human myometrium
Source: PubMed Central journal article supplement (PMC4894948; doi:10.1038/ncomms11565), 2016-05-25
Supplement: ncomms11565-s1.pdf [file ncomms11565-s1.pdf]

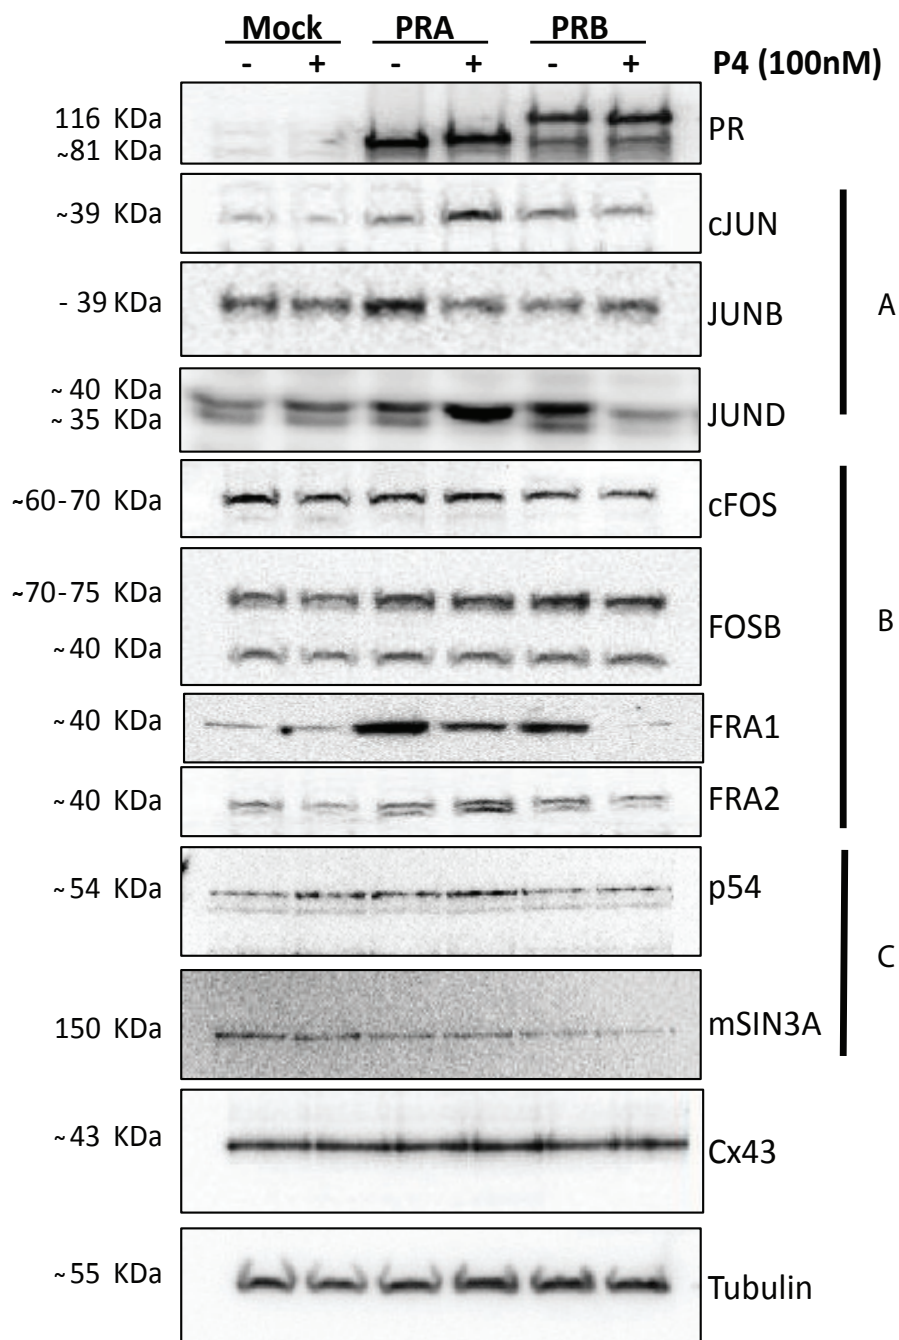

**Supplementary Figure 1: Expression validation of Mock, PRA and PRB stable cell lines** . Western blot analysis of PRA, PRB, endogenous Juns (A), Fos (B), co-repressor proteins (C) and Cx43 in hTERT-HM stable cell lines developed in our laboratory.

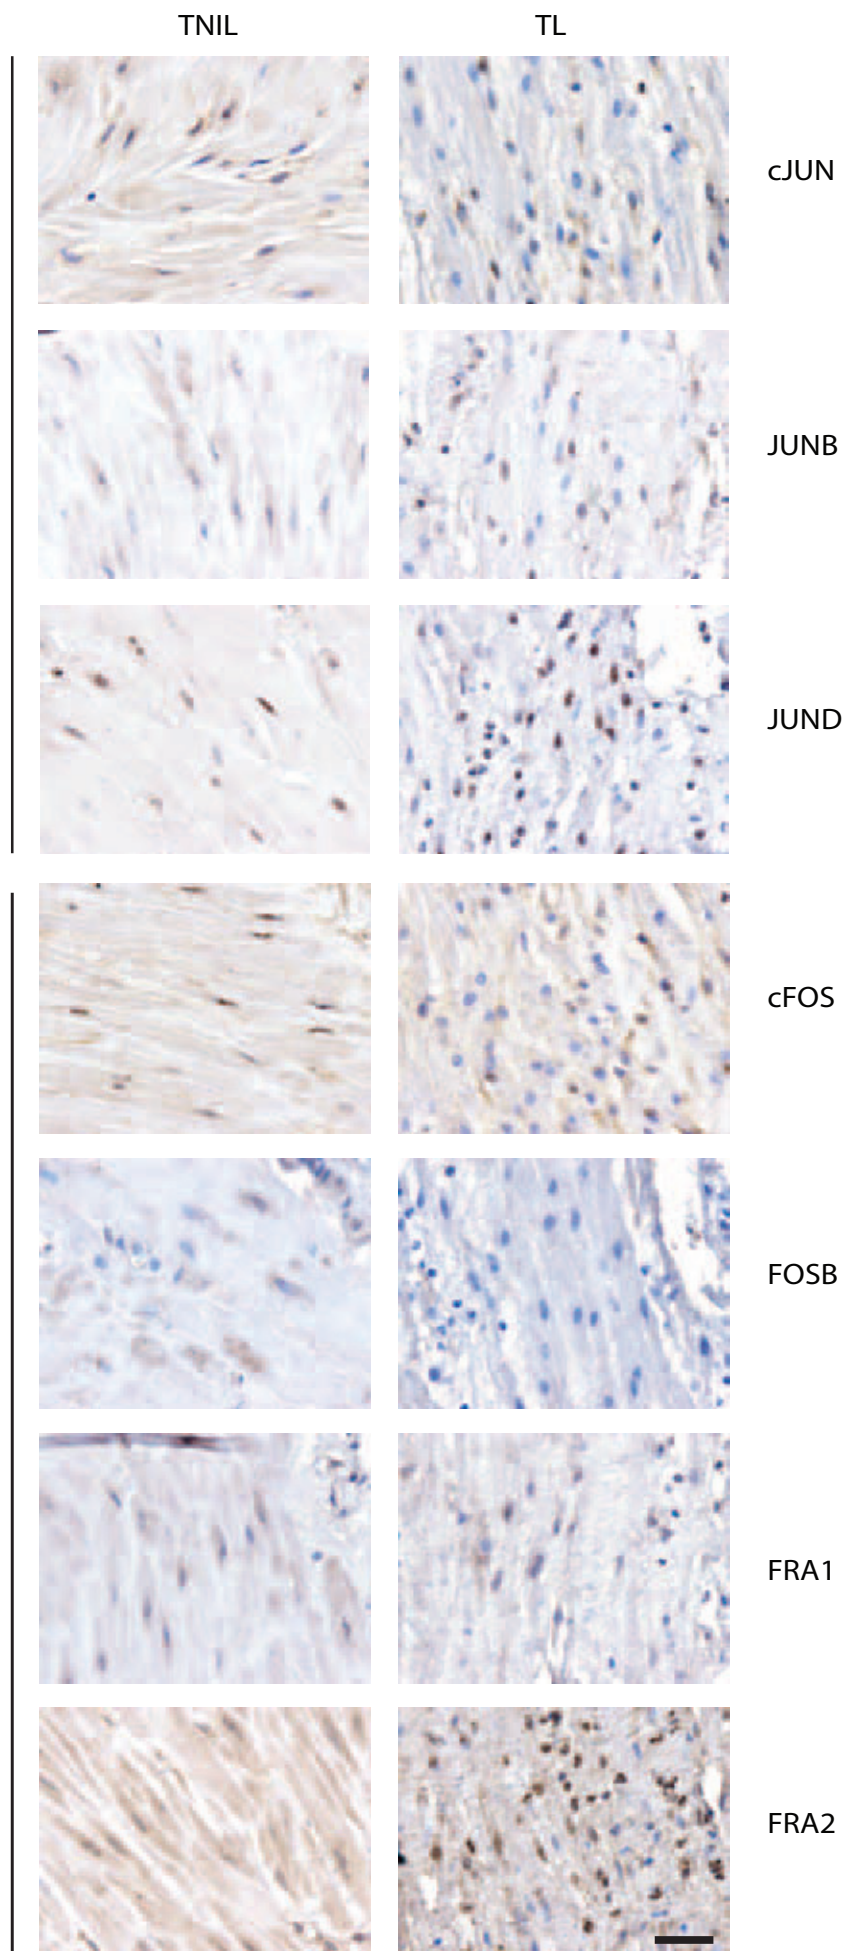

**Supplementary Figure 2: Expression of AP-1 factors in human myometrium.** Term human myometrium from non-laboring and laboring state. Representative pictures of IHC for JUN and FOS proteins. Scale bar = 40  $\mu$ m.

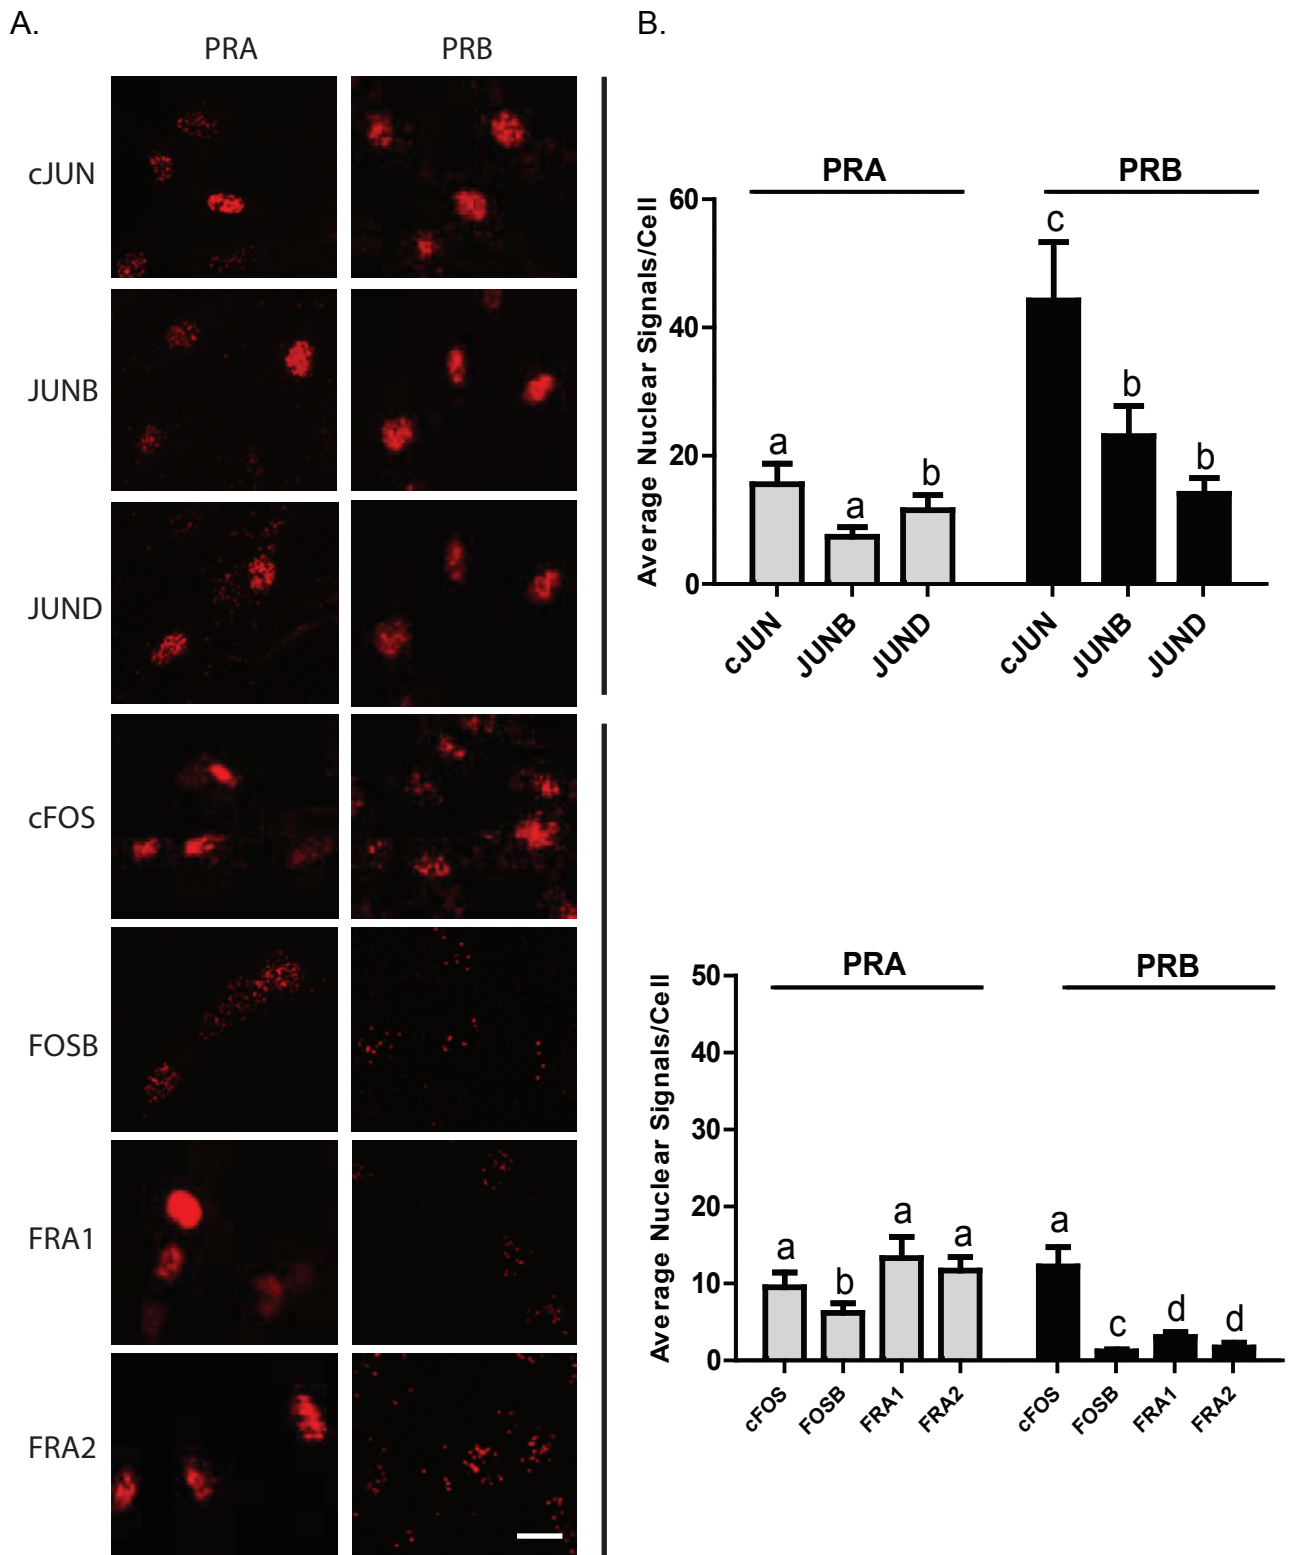

**Supplementary Figure 3: Interaction between PRs and AP-1 proteins is P4 independent.**

In-situ proximity ligation assay (PLA) of PRs with Juns and Fos proteins. A) Representative pics, and B) signal analysis (average nuclear signals/cell from three fields). PRA and PRB stale transfected hTERT-HM cells were treated with vehicle for 2 h and then subjected to PLA analysis. Data represents mean  $\pm$  SD.  $n = 3$  experiments. Two way ANOVA followed by bonferroni posttests show significant differences between PRA and PRB in the interaction of cJUN ( $p < 0.001$ ), Fra1 ( $p < 0.001$ ) and Fra2 ( $p < 0.01$ ). Scale bar = 40  $\mu$ m.

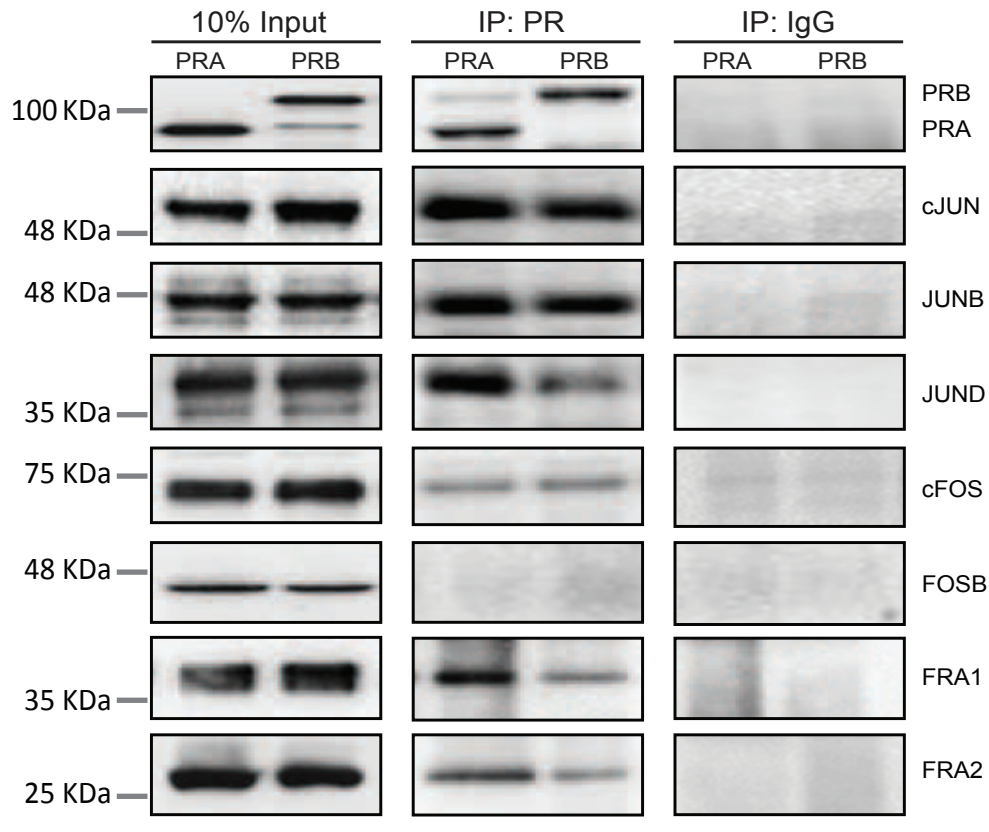

**Supplementary Figure 4: Co-IP analysis confirms the differential associations between PR isoforms and Jun/Fos proteins.** SHM cells were transfected with PRA or PRB along with Jun or Fos expression vectors and treated with 100 nM P4. 250  $\mu$ g of nuclear lysates were then subjected to Co-IP with PR antibody, immune complex was resolved by SDS-PAGE and immunoblotting with respective Jun or Fos antibodies. 10% Input from the cell lysates is shown in the left panel. Shown are representative blots from two independent experiments.



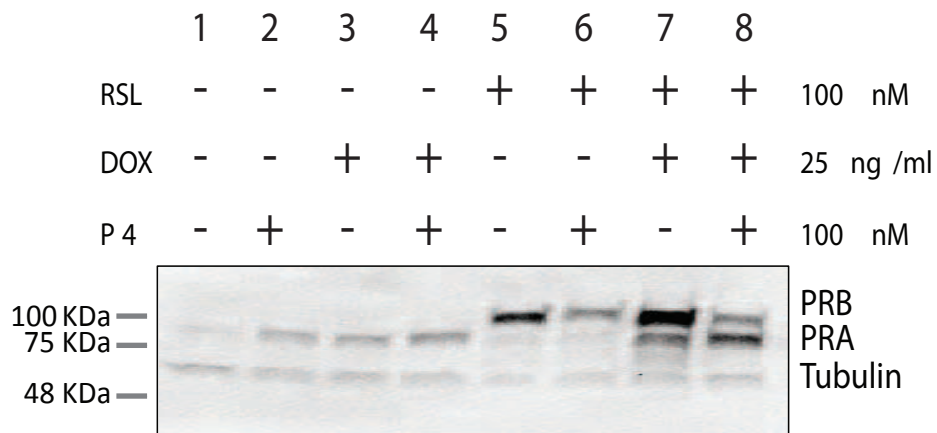

**Supplementary Figure 6:** Validation of PRA and PRB expression in hTERT-HM<sup>A/B</sup> cell line induced with either DOX (25 ng/ml) or RSL (100 nM) or both for 24 h and stimulated with vehicle or P4 (100 nM) for additional 2 h. Total lysates were subjected to SDS-PAGE and immunoblotting. Tubulin was used as a loading control.

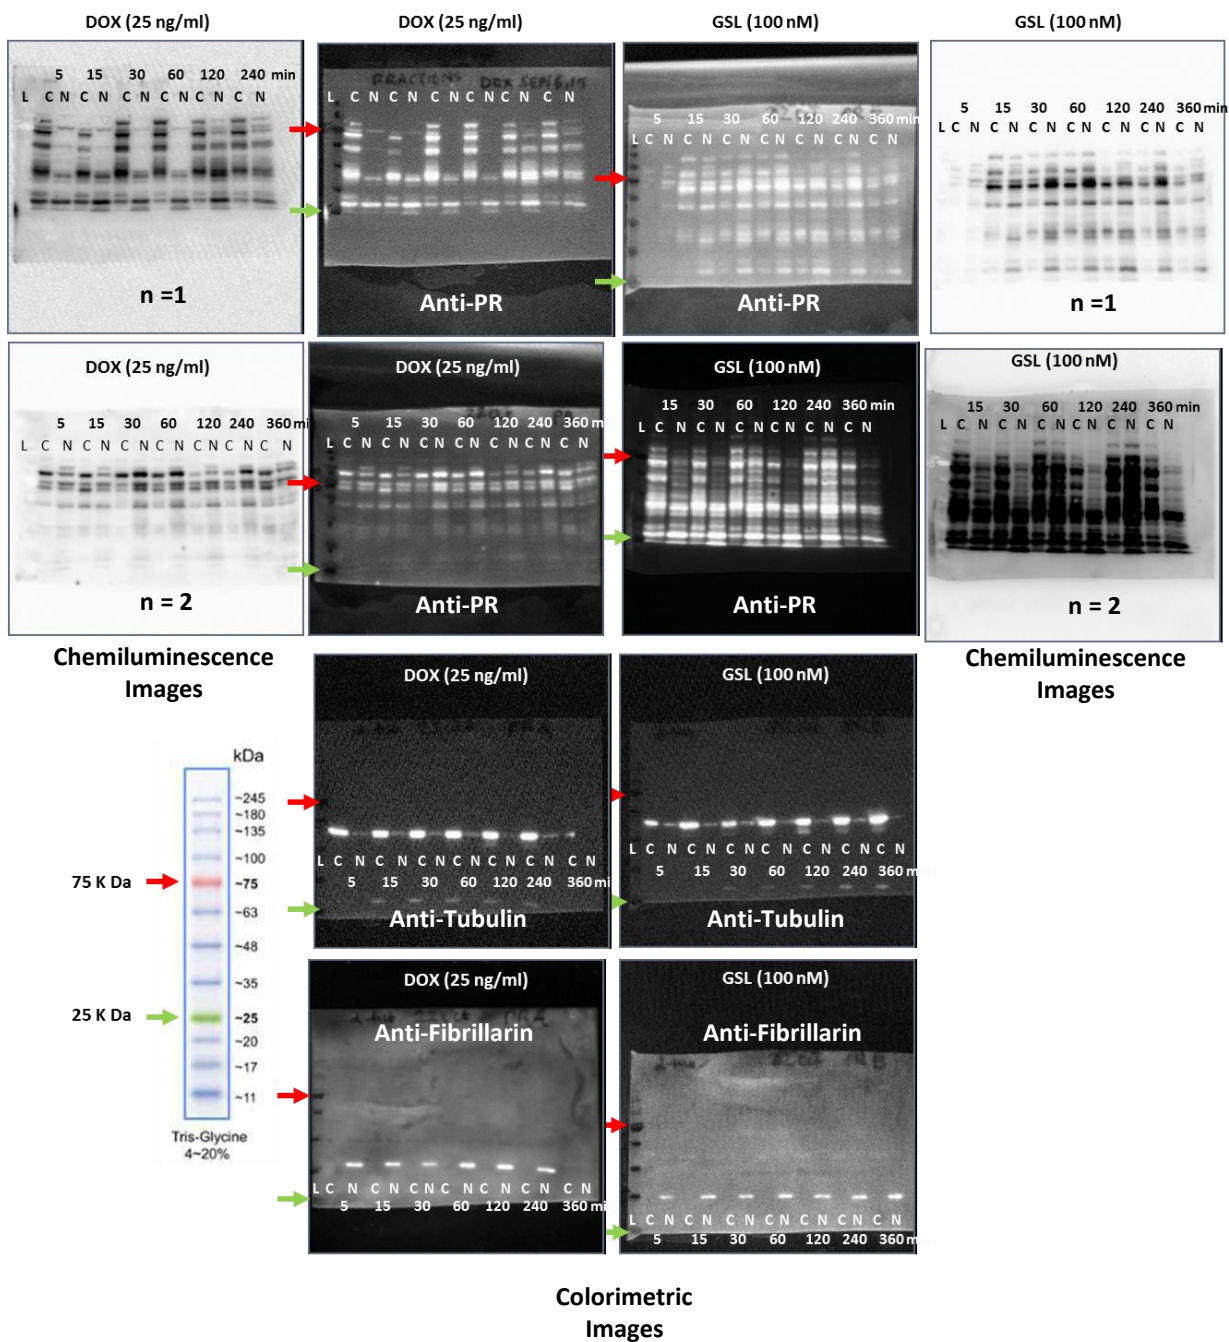

Supplementary Figure 7 A: Uncropped blots and replicates of Figure 5M.

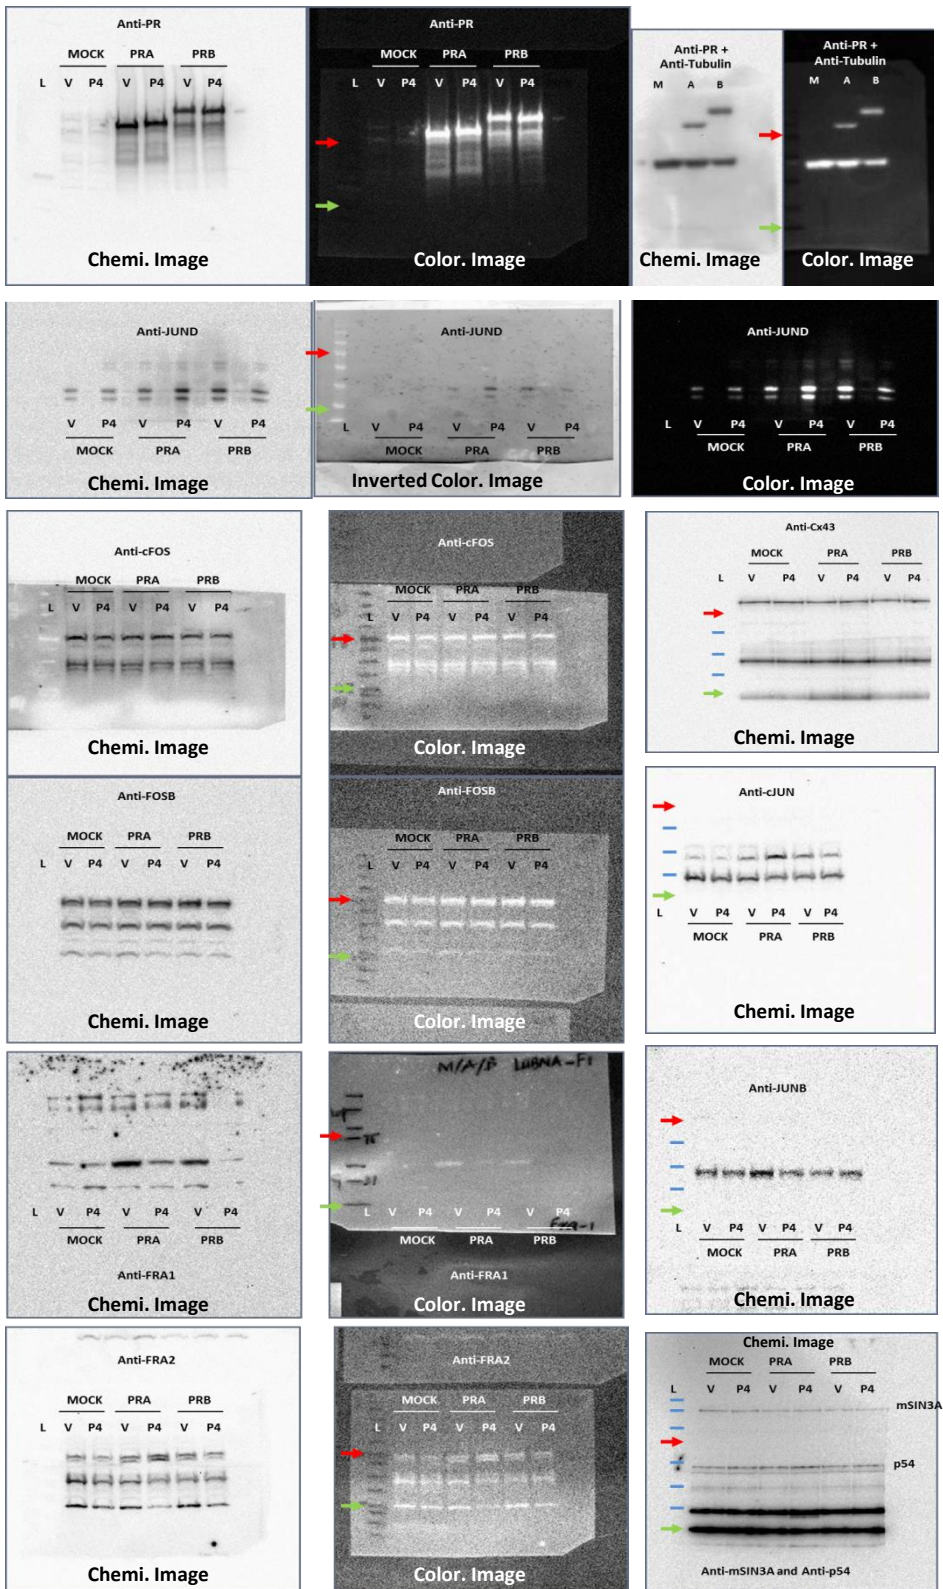

Supplementary Figure 7 B: Uncropped blots or replicates of Supplementary Figure 1.



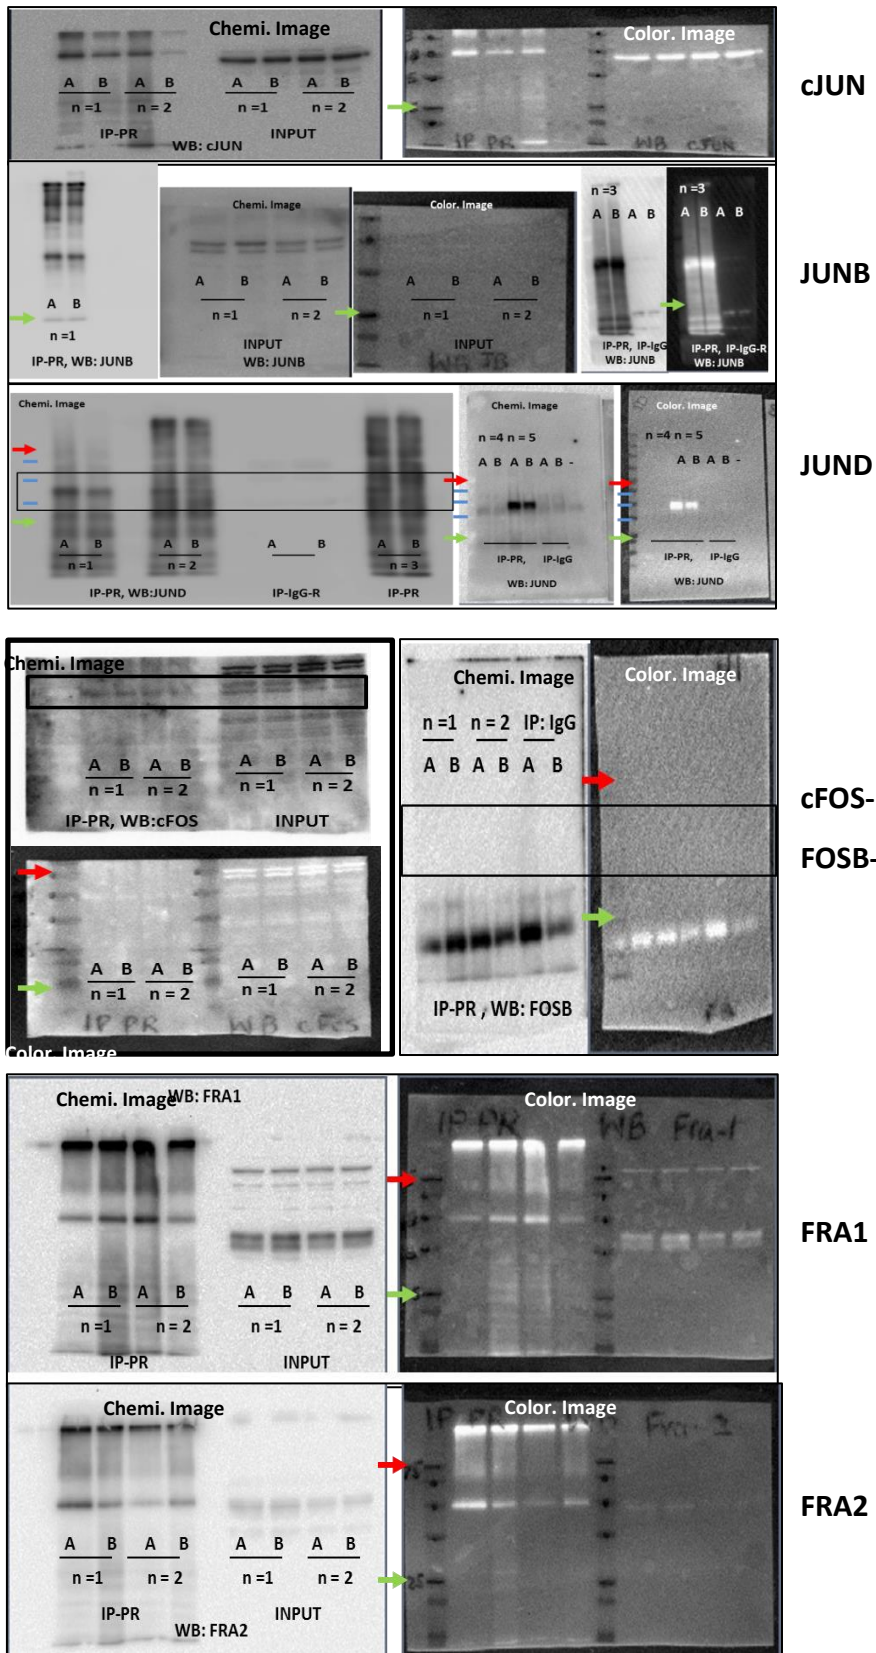

Supplementary Figure 7 C: Uncropped blots or replicates of Supplementary Figure 4.

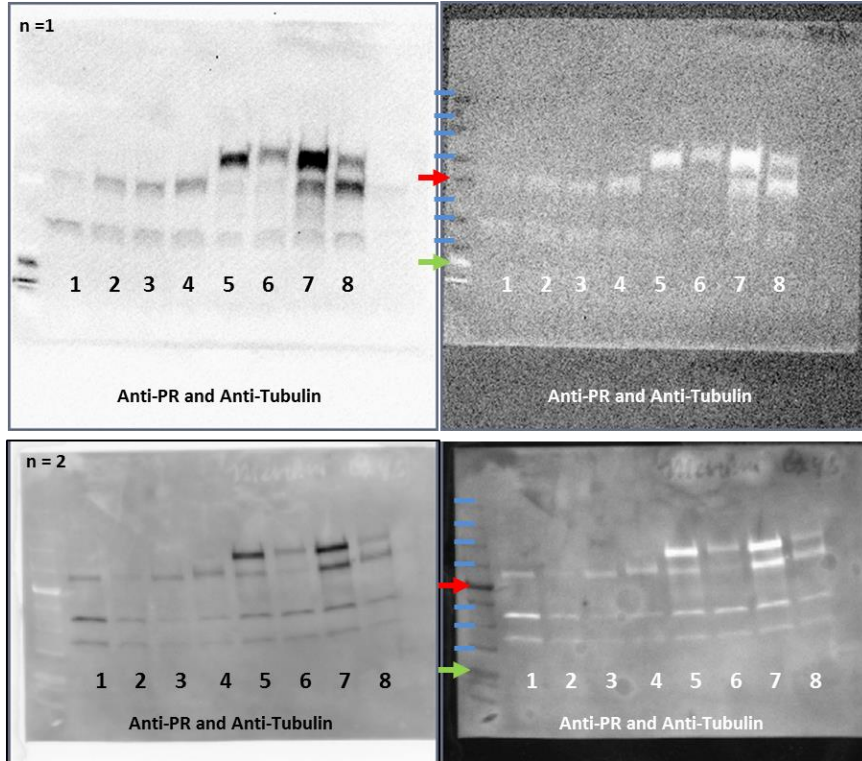

Supplementary Figure 7. D: Uncropped blots and replicate of Supplementary Figure 6.

**Supplementary Table 1: Sources and working concentrations of antibodies used in this study**

| ANTIGEN                  | ANTIBODY  | WORKING<br>CONCENTRATION<br>$\mu\text{g/ml}$ | SOURCE        |
|--------------------------|-----------|----------------------------------------------|---------------|
| cJUN                     | sc-376488 | 0.2                                          | Santa Cruz    |
| JUNB                     | sc-73     | 0.4                                          | Santa Cruz    |
| JUND                     | sc-74     | 0.4                                          | Santa Cruz    |
| cFOS                     | sc-52x    | 0.4                                          | Santa Cruz    |
| FOSB                     | sc-52926  | 0.2                                          | Santa Cruz    |
| FRA1                     | sc-271657 | 0.8                                          | Santa Cruz    |
| FRA2                     | sc-166102 | 0.4                                          | Santa Cruz    |
| p54 <sup>nrb</sup>       | sc-166704 | 0.4                                          | Santa Cruz    |
| mSIN3A                   | sc-994    | 0.8                                          | Santa Cruz    |
| Cx43                     | AB1728    | 0.2                                          | Millipore     |
| PR                       | sc-7208   | 0.2                                          | Santa Cruz    |
| PRB                      | C1A2      | 0.2                                          | Cell Sig.     |
| P4                       | 7720-0496 | 10                                           | AbD Serotec   |
| 20 $\alpha$ HSD (AKR1C1) | ab183078  | 5                                            | Abcam         |
| Fibrillarlin             | 2639S     | 0.015                                        | Cell Sig.     |
| Tubulin                  | T5168     | 5                                            | Sigma Aldrich |
